# Supplementary material for: Stimulant Medication Use in Children: A 12-Year Perspective
Source: Atypon-hosted journal article supplement (doi:10.1176/appi.ajp.2011.11030387), 2011-09-29
Supplement: appi.ajp.2011.11030387.ds001.pdf [file appi.ajp.2011.11030387.ds001.pdf]

**TABLE S2. Trends in Stimulant Use in the U.S Population 18 Years and Younger Based on the Medical Expenditure Panel Survey, 1996–2008, With 95% Confidence Intervals**

| Measure and Age Group       | 1996             | 1997             | 1998             | 1999             | 2000             | 2001             | 2002             | 2003             | 2004             | 2005             | 2006             | 2007             | 2008             |
|-----------------------------|------------------|------------------|------------------|------------------|------------------|------------------|------------------|------------------|------------------|------------------|------------------|------------------|------------------|
| Number of users (millions)  | 1.8<br>(1.4-2.2) | 2.0<br>(1.7-2.3) | 2.2<br>(1.8-2.6) | 2.1<br>(1.7-2.6) | 2.1<br>(1.6-2.7) | 2.4<br>(2.0-2.8) | 2.2<br>(1.9-2.6) | 2.3<br>(2.0-2.7) | 2.2<br>(1.8-2.6) | 2.1<br>(2.1-2.9) | 2.3<br>(1.7-2.4) | 2.3<br>(1.9-2.7) | 2.8<br>(2.3-3.2) |
| 0–5                         | 0.1<br>(0.0-0.1) | 0.1<br>(0.0-0.1) | 0.1<br>(0.0-0.2) | 0.1<br>(0.0-0.1) | 0.1<br>(0.0-0.1) | 0.1<br>(0.0-0.1) | 0.1<br>(0.0-0.1) | 0.1<br>(0.0-0.1) | 0.0<br>(0.0-0.1) | 0.0<br>(0.0-0.1) | 0.0<br>(0.0-0.1) | 0.0<br>(0.0-0.1) | 0.0<br>(0.0-0.0) |
| 6–12                        | 1.2<br>(0.9-1.5) | 1.2<br>(1.0-1.5) | 1.4<br>(1.0-1.7) | 1.4<br>(1.0-1.7) | 1.3<br>(0.9-1.6) | 1.3<br>(1.1-1.6) | 1.4<br>(1.1-1.6) | 1.3<br>(1.0-1.5) | 1.2<br>(0.9-1.4) | 1.2<br>(0.9-1.4) | 1.3<br>(1.0-1.6) | 1.3<br>(1.1-1.6) | 1.5<br>(1.2-1.8) |
| 13–18                       | 0.5<br>(0.4-0.7) | 0.7<br>(0.5-0.9) | 0.7<br>(0.5-0.9) | 0.7<br>(0.5-0.9) | 0.8<br>(0.5-1.1) | 0.9<br>(0.7-1.2) | 0.8<br>(0.6-1.0) | 1.0<br>(0.7-1.2) | 1.0<br>(0.7-1.2) | 0.8<br>(0.6-1.1) | 1.0<br>(0.7-1.2) | 1.0<br>(0.8-1.2) | 1.3<br>(1.0-1.6) |
| Percent with use            | 2.4<br>(1.8-2.9) | 2.7<br>(2.3-3.1) | 2.8<br>(2.3-3.3) | 2.8<br>(2.3-3.3) | 2.8<br>(2.3-3.3) | 3.1<br>(2.6-3.5) | 2.9<br>(2.5-3.3) | 3.0<br>(2.6-3.5) | 2.8<br>(2.4-3.3) | 2.7<br>(2.3-3.1) | 2.9<br>(2.5-3.4) | 3.0<br>(2.5-3.5) | 3.5<br>(3.0-4.1) |
| 0–5                         | 0.3<br>(0.0-0.5) | 0.4<br>(0.1-0.6) | 0.4<br>(0.1-0.7) | 0.3<br>(0.1-0.5) | 0.3<br>(0.0-0.5) | 0.4<br>(0.1-0.6) | 0.3<br>(0.0-0.6) | 0.3<br>(0.0-0.6) | 0.1<br>(0.0-0.3) | 0.1<br>(0.0-0.2) | 0.1<br>(0.0-0.2) | 0.1<br>(0.0-0.2) | 0.1<br>(0.0-0.2) |
| 6–12                        | 4.2<br>(3.2-5.2) | 4.4<br>(3.6-5.2) | 4.8<br>(3.7-5.9) | 4.7<br>(3.6-5.8) | 4.4<br>(3.5-5.3) | 4.7<br>(3.9-5.5) | 4.8<br>(3.9-5.6) | 4.4<br>(3.5-5.3) | 4.1<br>(3.2-5.1) | 4.2<br>(3.4-5.1) | 4.7<br>(3.7-5.6) | 4.6<br>(3.8-5.5) | 5.1<br>(4.1-6.1) |
| 13–18                       | 2.3<br>(1.5-3.1) | 2.9<br>(2.2-3.7) | 2.9<br>(2.0-3.8) | 2.9<br>(2.1-3.7) | 3.4<br>(2.4-4.4) | 3.8<br>(2.9-4.7) | 3.2<br>(2.6-3.9) | 3.9<br>(3.0-4.8) | 3.8<br>(2.8-4.8) | 3.3<br>(2.5-4.1) | 3.7<br>(2.8-4.6) | 3.9<br>(3.0-4.8) | 4.9<br>(3.9-6.1) |
| Total population (millions) | 75.3             | 75.6             | 76.5             | 76.7             | 76.7             | 77.0             | 77.0             | 77.2             | 77.3             | 77.4             | 78.4             | 78.3             | 79.0             |
| 0–5                         | 23.9             | 23.8             | 23.8             | 23.9             | 24.1             | 23.7             | 23.3             | 23.1             | 23.3             | 23.8             | 24.4             | 24.3             | 24.7             |
| 6–12                        | 27.9             | 28.3             | 28.4             | 29.3             | 28.5             | 28.5             | 28.6             | 28.7             | 28.2             | 27.9             | 28.0             | 28.3             | 28.9             |
| 13–18                       | 23.5             | 23.5             | 24.4             | 23.5             | 24               | 24.8             | 25.1             | 25.4             | 25.8             | 25.7             | 25.9             | 25.6             | 25.4             |
| Sample size                 | 6,595            | 10,285           | 7,282            | 7,235            | 7,286            | 9,710            | 11,713           | 10,528           | 10,297           | 10,172           | 10,152           | 8,968            | 9,661            |
| 0–5                         | 2,018            | 3,081            | 2,116            | 2,158            | 2,221            | 2,924            | 3,455            | 3,194            | 3,177            | 3,114            | 3,103            | 2,674            | 3,046            |
| 6–12                        | 2,577            | 4,008            | 2,844            | 2,872            | 2,851            | 3,733            | 4,498            | 3,992            | 3,898            | 3,825            | 3,792            | 3,389            | 3,588            |
| 13–18                       | 2,000            | 3,196            | 2,322            | 2,205            | 2,214            | 3,053            | 3,760            | 3,342            | 3,222            | 3,233            | 3,257            | 2,905            | 3,027            |
